# Supplementary material for: Hemin@metal–organic framework with peroxidase-like activity and its application to glucose detection
Source: Royal Society of Chemistry journal article supplement (doi:10.1039/c3cy00268c), 2013-01-01
Supplement: c3cy00268c.pdf [file c3cy00268c.pdf]

## Electronic Supplementary Information

### Hemin@metal-organic framework as Peroxidase-like Activity and Its Application to Glucose Detection

Feng-Xiang Qin<sup>a</sup>, Shao-Yi Jia<sup>a</sup>, Fei-Fei Wang<sup>a</sup>, Song-Hai Wu<sup>a</sup>, Jia Song<sup>a</sup> and Yong Liu<sup>b\*</sup>

<sup>a</sup> School of Chemical Engineering and Technology, Tianjin University, Tianjin, P.R. China.

<sup>b</sup> School of Chemistry & Chemical Engineering, Tianjin University of Technology, Tianjin, P.R. China.

\* To whom correspondence should be addressed. Fax/Tel: +86 022-87401961; E-mail: [tjutliuyong@163.com](mailto:tjutliuyong@163.com) (Y. Liu).

**Table S1** The textural properties of materials

| Material                    | $S_{\text{BET}}^{[a]}$<br>( $\text{m}^2/\text{g}$ ) | $S_{\text{Langmuir}}^{[b]}$<br>( $\text{m}^2/\text{g}$ ) | Total Pore Volume<br>( $\text{cm}^3/\text{g}$ ) |
|-----------------------------|-----------------------------------------------------|----------------------------------------------------------|-------------------------------------------------|
| MIL-101(Al)-NH <sub>2</sub> | 1608.3                                              | 2211.8                                                   | 0.879                                           |
| H@M                         | 407.6                                               | 556.6                                                    | 0.429                                           |
| MIL-53(Al)-NH <sub>2</sub>  | 464.5                                               | 650.9                                                    | 0.982                                           |

<sup>[a]</sup>  $S_{\text{BET}}$  is the BET specific surface area. <sup>[b]</sup>  $S_{\text{Langmuir}}$  is langmuir surface area.

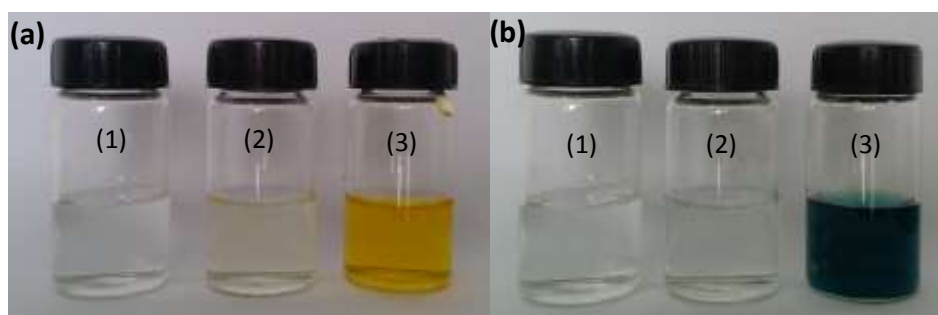

**Fig. S1** Images of oxidation color reaction of 10 mM OPD (a), and 0.6 mM ABTS (b) by 10 mM H<sub>2</sub>O<sub>2</sub> after catalyzing by H@M hybrid material at pH 5.0 citrate buffer solution after reaction for 10 min. (1) buffer solution; (2) no catalyst; (3) H@M hybrid material.

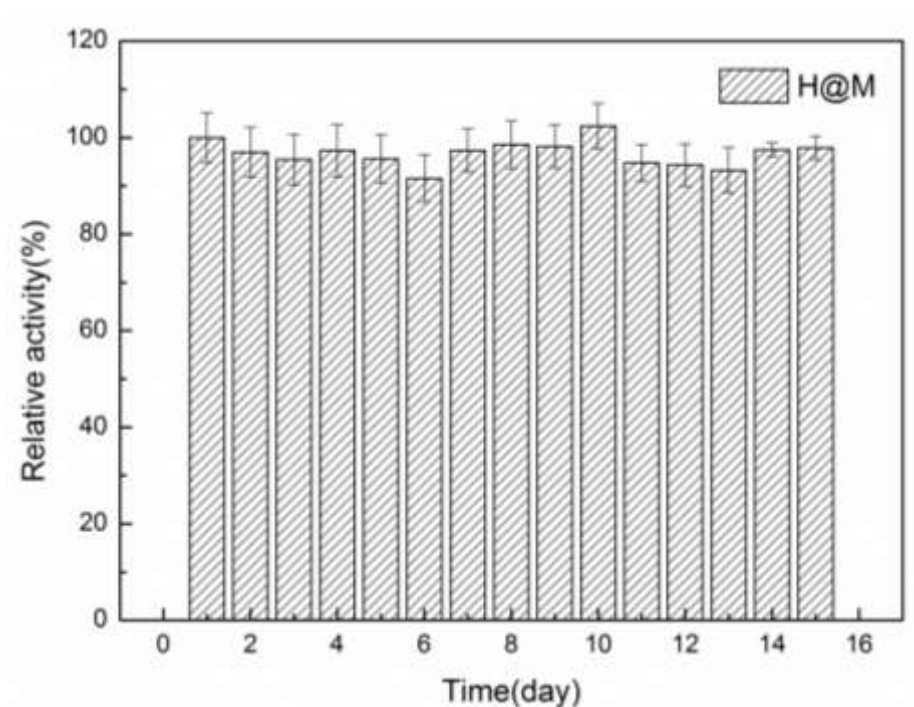

**Fig. S2** The storage stability of the as-prepared H@M hybrid material

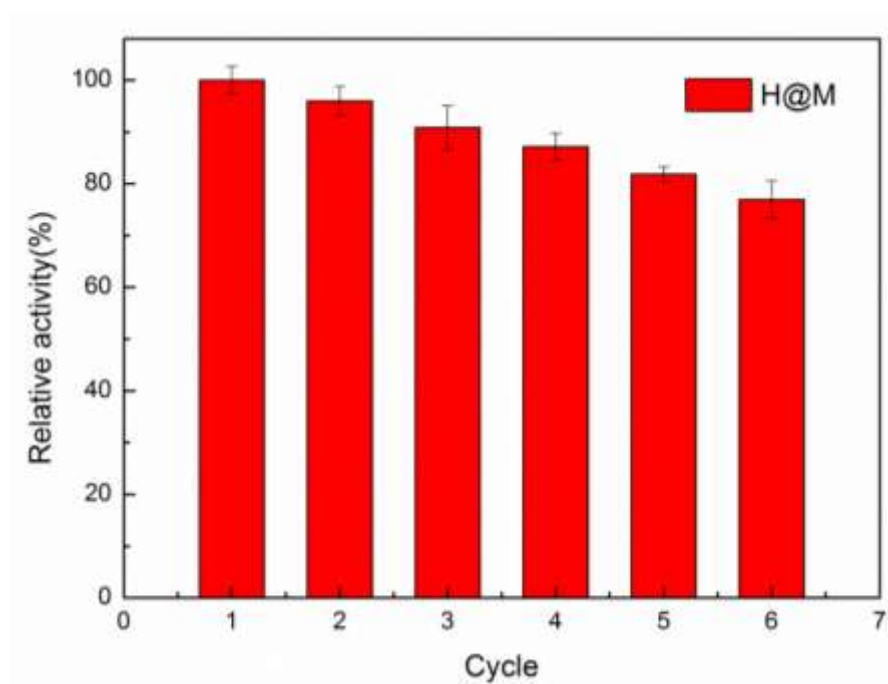

**Fig. S3** Batch-to-batch reproducibility study of the as-prepared H@M hybrid material over various cycles using identical reaction conditions, each cycle has three duplicate determinations. Reaction condition: 20  $\mu\text{g/mL}$  H@M, 0.8 mM TMB, 10 mM  $\text{H}_2\text{O}_2$ , 50 mM citrate buffer, pH 5.0, reaction time 10min.
